# Supplementary material for: Integrated microbiota and metabolite profiles link Crohn’s disease to sulfur metabolism
Source: PubMed Central journal article supplement (PMC7456324; doi:10.1038/s41467-020-17956-1), 2020-08-28
Supplement: 41467_2020_17956_MOESM2_ESM.pdf [file 41467_2020_17956_MOESM2_ESM.pdf]

**Title:** Supplementary Data file 1:

**Description:** Differentially abundant sulfated metabolites in CD patients

**Title:** Supplementary Data file 2:

**Description:** Correlation Similarity Matrix in the merged human donors and humanized datasets

**Title:** Supplementary Data file 3:

**Description:** Differentially abundant sulfated metabolites in humanized mice gut content

**Title:** Supplementary Data file 4:

**Description:** Human and Humanized fecal samples for metabolomics analysis

**Title:** Supplementary Data file 5:

**Description:** Identified metabolites and their annotation

**Title:** Supplementary Data file 6:

**Description:** Raw peak areas of metabolomics data generated during this study
